# Supplementary material for: Frequency of first and second-line drug resistance-associated mutations among resistant Mycobacterium tuberculosis clinical isolates from São Paulo, Brazil
Source: PubMed Central journal article supplement (PMC7207153; doi:10.1590/0074-02760200055), 2020-05-08
Supplement: 1678-8060-mioc-115-e200055-s.pdf [file 1678-8060-mioc-115-e200055-s.pdf]

TABLE I  
List of primers used in this study

| Target gene      | Primer                 | Sequence (5'-3')         | TM (°C) | Fragment size (bp) | Reference                                                 |
|------------------|------------------------|--------------------------|---------|--------------------|-----------------------------------------------------------|
| <i>rrs</i>       | <i>rrs</i> 420 Forward | TTCACCATCGACGAAGGTCC     | 62      | 571                | Via et al. <sup>(4)</sup>                                 |
|                  | <i>rrs</i> 990 Reverse | CTAGACGCGTCCTGTGCATGT    |         |                    |                                                           |
|                  | <i>rrs</i> P2          | GAGTACGGCCGCAAGGCTA      | 66      | 680                | Machado <sup>(6)</sup><br>Alangaden et al. <sup>(2)</sup> |
|                  | <i>rrs</i> 1539        | GGGGCGTTTTTCGTGGTGCTCC   |         |                    |                                                           |
| <i>fabG-inhA</i> | <i>inhA</i> Forward    | CCTCGCTGCCCAGAAAGGGA     | 64      | 248                | Gonçalves et al. <sup>(5)</sup>                           |
|                  | <i>inhA</i> Reverse    | ATCCCCGGTTTTCTCCGGT      |         |                    |                                                           |
| <i>katG</i>      | <i>katG</i> Forward    | GCAGATGGGGCTGATCTACG     | 60      | 555                |                                                           |
|                  | <i>katG</i> Reverse    | AACTCGTCGGCCAATTCCTC     |         |                    |                                                           |
| <i>gyrA</i>      | <i>gyrA</i> Forward    | ATCGCCGGGTGCTCTATG       | 60      | 321                | Machado <sup>(6)</sup>                                    |
|                  | <i>gyrA</i> Reverse    | GGCCGTCGTAGTTAGGGATG     |         |                    |                                                           |
| <i>gyrB</i>      | <i>gyrB</i> Forward    | GTCGTTGTGAACAAGGCTGTG    |         | 413                |                                                           |
|                  | <i>gyrB</i> Reverse    | GTGAAATATGTTGGCCGTC      |         |                    |                                                           |
| <i>rpoB</i>      | <i>rpoB</i> Forward    | GGGAGCGGATGACCACCCA      | 60      | 350                | Portugal et al. <sup>(3)</sup>                            |
|                  | <i>rpoB</i> Reverse    | GCGGTACGGCGTTTTTCGATGAAC |         |                    |                                                           |

T<sub>M</sub>: temperature of melting; bp: base pairs.

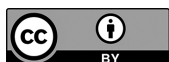

TABLE II  
Description of the treatments of patients from the State of São Paulo who progressed to more drug resistant forms of tuberculosis

| ID | Gender/<br>Age <sup>a</sup> | Year of<br>MDR-TB<br>diagnosis | Year of<br>pre XDR-TB<br>diagnosis | Year of<br>XDR-TB<br>diagnosis | Drug resistance <sup>b</sup>        | Mutation-genetic target                                                                               | Treatment regimens<br>(year, drugs received and outcome)                                                                                                                                                                                                                            | Outcome/<br>Year             | Co-morbidities<br>or risk behaviors |
|----|-----------------------------|--------------------------------|------------------------------------|--------------------------------|-------------------------------------|-------------------------------------------------------------------------------------------------------|-------------------------------------------------------------------------------------------------------------------------------------------------------------------------------------------------------------------------------------------------------------------------------------|------------------------------|-------------------------------------|
| 05 | M<br>62                     | -                              | 2012                               | 2015                           | RIF, INH, PZA, EMB, CM, OFX, LFX    | Asp516Val- <i>rpoB</i> , Ser315Thr- <i>katG</i><br>Asp94Gly- <i>gyrA</i><br>A1401G- <i>rrs</i>        | 2010/2011: EMB, ETO, PZA, SM - Treatment failure<br>2011/2014: EMB, PZA, TRD, SM - Treatment failure<br>2014/2016: RIF, CFZ - Treatment failure<br>2017/2018: AM, ETO, CFZ - Treatment failure<br>2018: EMB, PZA, SM - Under treatment                                              | Under<br>treatment           | None reported                       |
| 18 | F<br>41                     | -                              | 2012                               | 2013                           | RIF, INH, PZA, EMB, OFX, CM, AM, KN | Ser531Leu- <i>rpoB</i> , Ser315Thr- <i>katG</i><br>Asp94Gly- <i>gyrA</i> A1401G- <i>rrs</i>           | 2010/2012: PZA, EMB, SM, TRD - Treatment failure<br>2012/2014: PZA, EMB, ETO, TRD, AM - Treatment failure<br>2014/2016: RIF, CFZ - Treatment failure                                                                                                                                | Treatment<br>failure<br>2016 | None reported                       |
| 36 | M<br>29                     | 2014                           | 2016                               | -                              | RIF, INH, PZA, EMB, LFX             | Ser531Leu- <i>rpoB</i> , Ser315Thr- <i>katG</i><br>Asp94Asn - <i>gyrA</i>                             | 2014: RIF, INH, PZA, EMB - Treatment failure<br>2014/2015: PZA, EMB, SM, TDA - Treatment failure<br>2015/2016: PZA, EMB, TDA, AM - Treatment failure<br>2016: PZA, EMB, TDA, CFZ - Lost to follow-up<br>2017: PZA, EMB, CFZ - Lost to follow-up<br>2019: PZA, CFZ - Under treatment | Under<br>treatment<br>2019   | None reported                       |
| 43 | M<br>48                     | -                              | 2014                               | 2016                           | RIF, INH, PZA, SM, OFX, CM          | Ser531Leu- <i>rpoB</i> , Ser315Thr- <i>katG</i><br>Asn538Asp <i>gyrB</i>                              | 2013/2014: EMB, TRD - Treatment failure<br>2014/2107: RIF, INH, CFZ - Treatment failure<br>2017/2019: EMB, AM, CFZ - Cured                                                                                                                                                          | Cured<br>2019                | None reported                       |
| 50 | M<br>66                     | 2013                           | 2015                               | -                              | RIF, INH, EMB, PZA, SM, OFX         | Ser531Leu- <i>rpoB</i> , Ser315Thr- <i>katG</i><br>Asp94Gly <i>gyrA</i>                               | 2013/2014: RIF, INH, PZA, EMB - Treatment failure<br>2014/2015: PZA, EMB, TRD - Treatment failure<br>2015/2017: OFX, TRD, AM, CFZ - Treatment failure<br>2017: PZA, EMB, TRD - Died                                                                                                 | Died<br>2017                 | Hepatitis B<br>and C                |
| 59 | F<br>27                     | 2014                           | 2016                               | -                              | RIF, INH, EMB, PZA, OFX, LFX        | Ser531Leu- <i>rpoB</i> , Ser315Thr- <i>katG</i><br>Asp94Gly <i>gyrA</i>                               | 2014/2016: PZA, EMB, TRD, AM - Treatment failure<br>2016: ETO, CFZ - Died                                                                                                                                                                                                           | Died<br>2016                 | None reported                       |
| 61 | M<br>50                     | 2013                           | -                                  | -                              | RIF, INH                            | Ser531Leu- <i>rpoB</i> , C-15T- <i>inhA</i>                                                           | 2013: RIF, INH, PZA, EMB - Treatment failure<br>2013/2015: PZA, EMB, ST, TRD - Cured<br>2017/2019: PZA, EMB, ETO - Died                                                                                                                                                             | Died<br>2019                 | Alcohol abuse<br>and smoking        |
| 62 | M<br>58                     | 2013 <sup>c</sup>              | -                                  | -                              | RIF, INH                            | Ser531Leu- <i>rpoB</i> , Met732Arg- <i>katG</i>                                                       | 2013: PZA, EMB, TRD - Lost to follow-up<br>2015: PZA, EMB, TRD, AM - Lost to follow-up<br>2017: RIF, INH, PZA, EMB - Treatment failure                                                                                                                                              | Treatment<br>failure<br>2017 | None reported                       |
| 72 | M<br>36                     | -                              | 2013                               | 2016                           | RIF, INH, PZA, EMB, LFX, KN         | Ser531Leu- <i>rpoB</i> Arg463Leu, G1430del<br><i>katG</i> , A1401G <i>rrs</i> , Asp94Gly- <i>gyrA</i> | None reported                                                                                                                                                                                                                                                                       | None<br>reported             | None reported                       |
| 84 | F<br>53                     | -                              | 2012                               | 2014                           | RIF, INH, CM, AM, KN, OFX           | His526Tyr- <i>rpoB</i> , Ser315Thr- <i>katG</i> ,<br>A1401G <i>rrs</i> , Asp449Val <i>gyrB</i>        | 2014/2015: ETO, CFZ - Lost to follow-up<br>2016: PZA, ETO, CFZ - Lost to follow-up<br>2018: PZA, CFZ - Under treatment                                                                                                                                                              | Under<br>treatment<br>2018   | Diabetes mel-<br>litus, smoking     |

a: age; b: DST results at the time of XDR-TB diagnosis; c: patient with an isolate in 2012 only INH-resistant; INH: isoniazid; RIF: rifampicin; SM: streptomycin; PZA: pyrazinamide; EMB: ethambutol; CM: capreomycin; KN: kanamicin; AM: amikacin; OFX: ofloxacin; LFX: levofloxacin; CFZ: clofazimine; TRD: terizidone; ETO: ethionamide. F: female; M: male.
